# Supplementary material for: Metal ions provide structural stability and compactness to tetrameric purothionin
Source: Royal Society of Chemistry journal article supplement (doi:10.1039/c6ra16576a), 2016-01-01
Supplement: c6ra16576a1.pdf [file c6ra16576a1.pdf]

## Electronic Supplementary Information

### **Metal Ions Provide Structural Stability and Compactness to Tetrameric Purothionin**

Swagata Das, Uttam Pal and Nakul Chandra Maiti\*

Structural Biology & Bioinformatics Division, CSIR-Indian Institute of Chemical Biology, 4, Raja S.C. Mullick Road, Kolkata 700032, India

**\*Corresponding author:** Nakul Chandra Maiti. Telephone: +91-33-2499-5940, +91-33-2499-5886; Fax: 12 +91-33-2473-5197. Email: [ncmaiti@iicb.res.in](mailto:ncmaiti@iicb.res.in)

**Fig S1. SDS PAGE of 1mg/ml purothionin solution.**

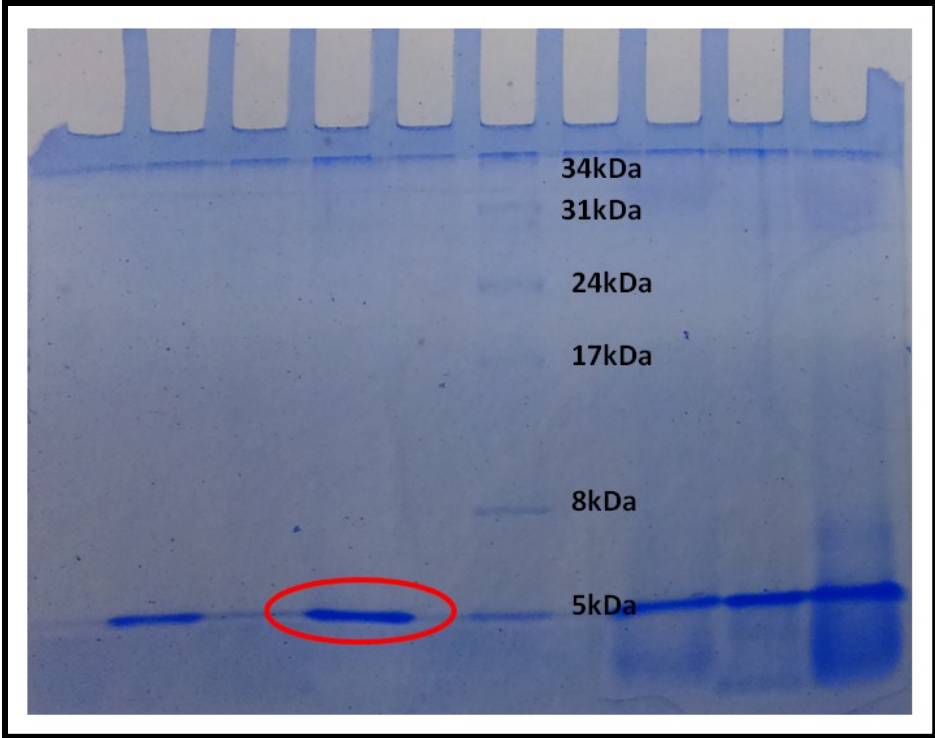

**Fig S2. MALDI TOF Analysis of purothionin.**

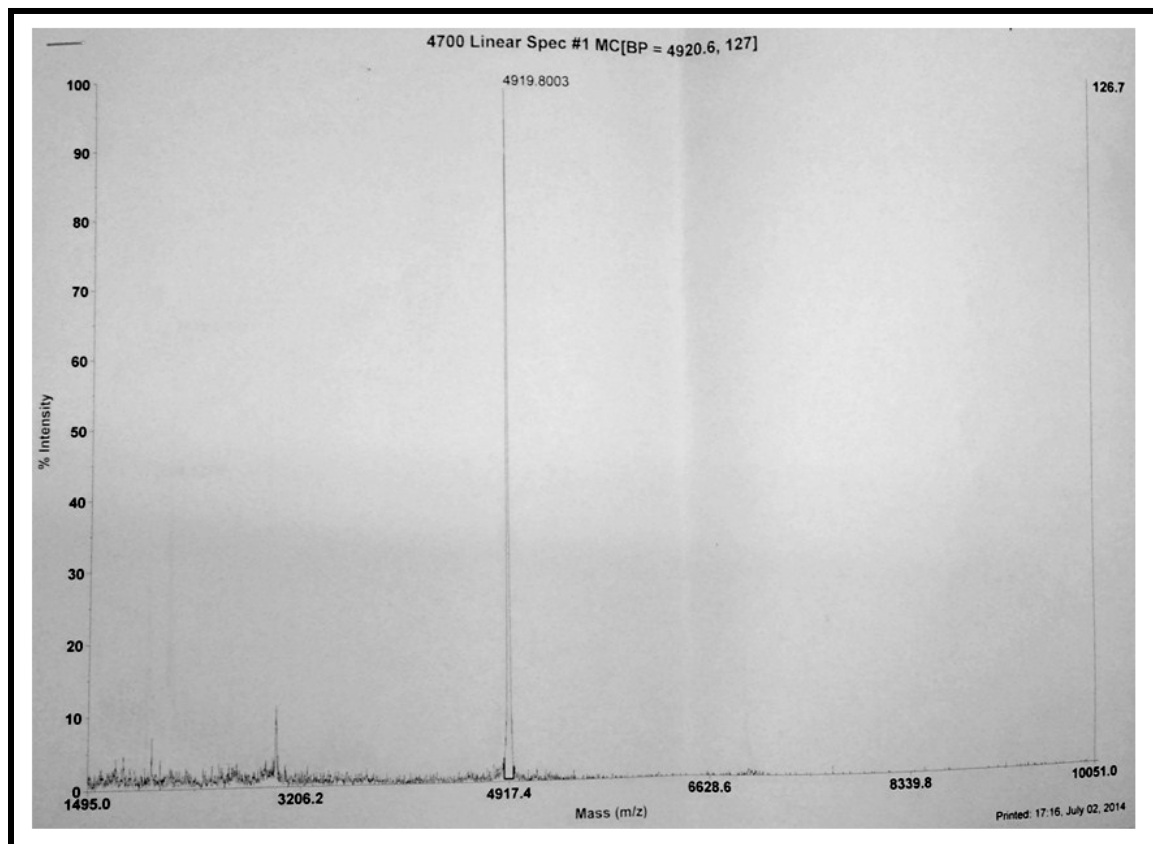

**Fig S3. Changes in the secondary structural components such as coils, turns and sheets w.r.t. to the simulation time scale (left panel) and the residue-wise analyses (right panel) are shown in the absence of ions (first from top) followed by in the presence of  $\text{Ca}^{2+}$  and  $\text{Mg}^{2+}$ . Green color, in absence of ions; Orange color, in presence of  $\text{Ca}^{2+}$  and blue color, in presence of  $\text{Mg}^{2+}$ . In the right panel, the four subunits are indicated by the red dotted grid lines.**

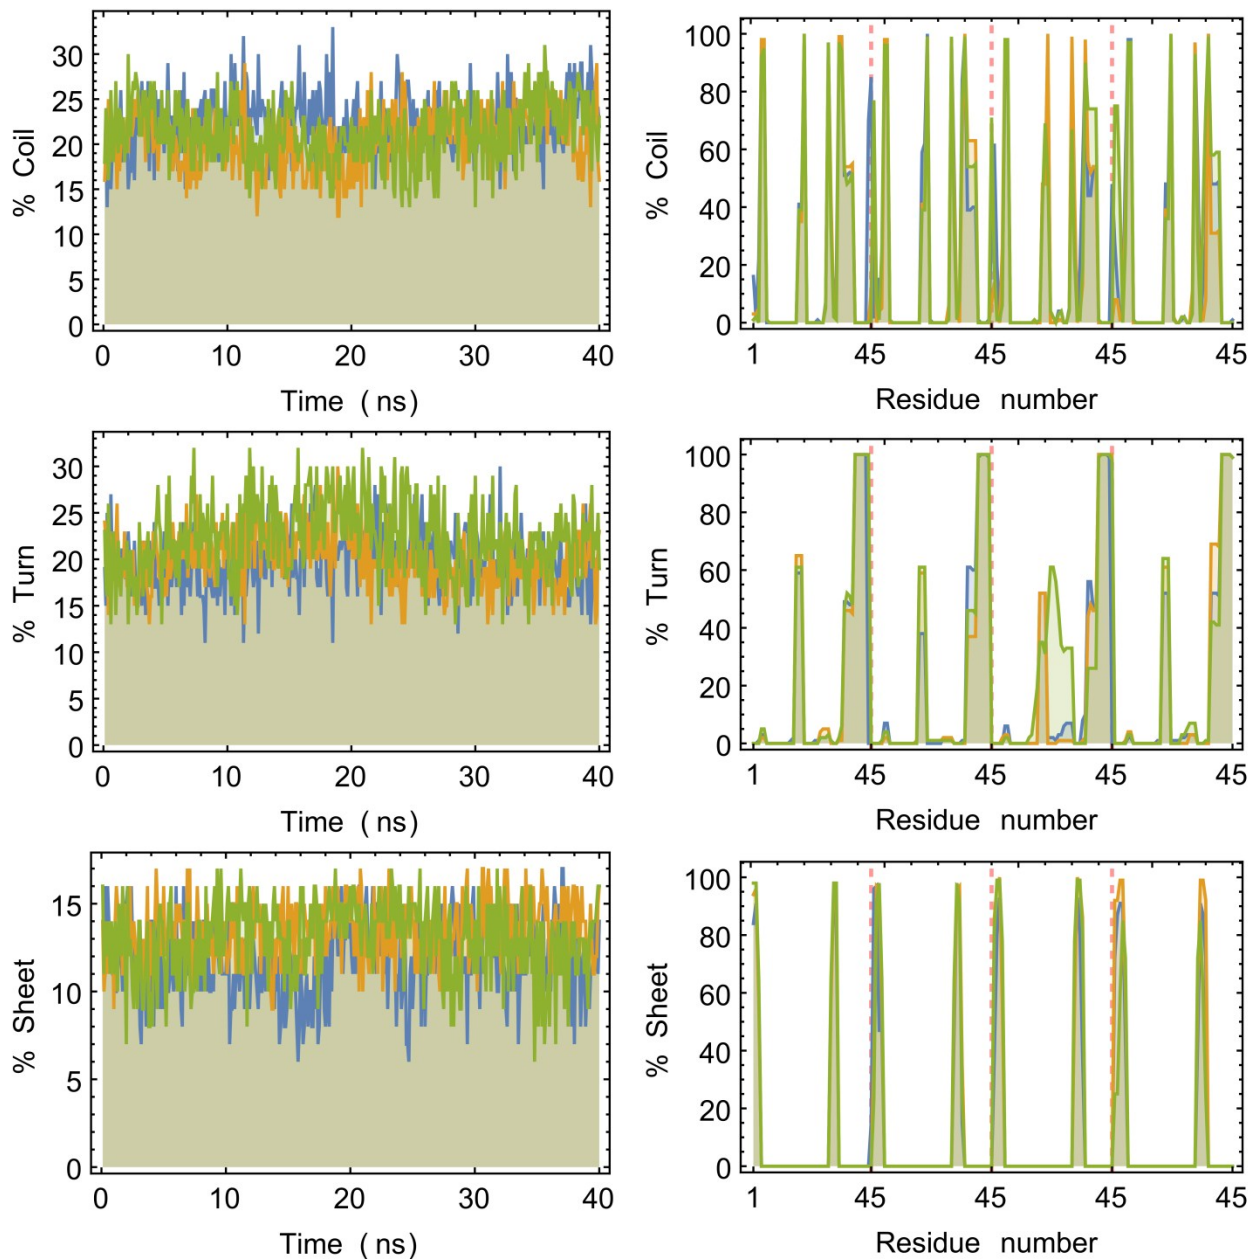

Fig S4. Solid state FT-IR spectra of purothionin (range 600-2000 $\text{cm}^{-1}$ ).

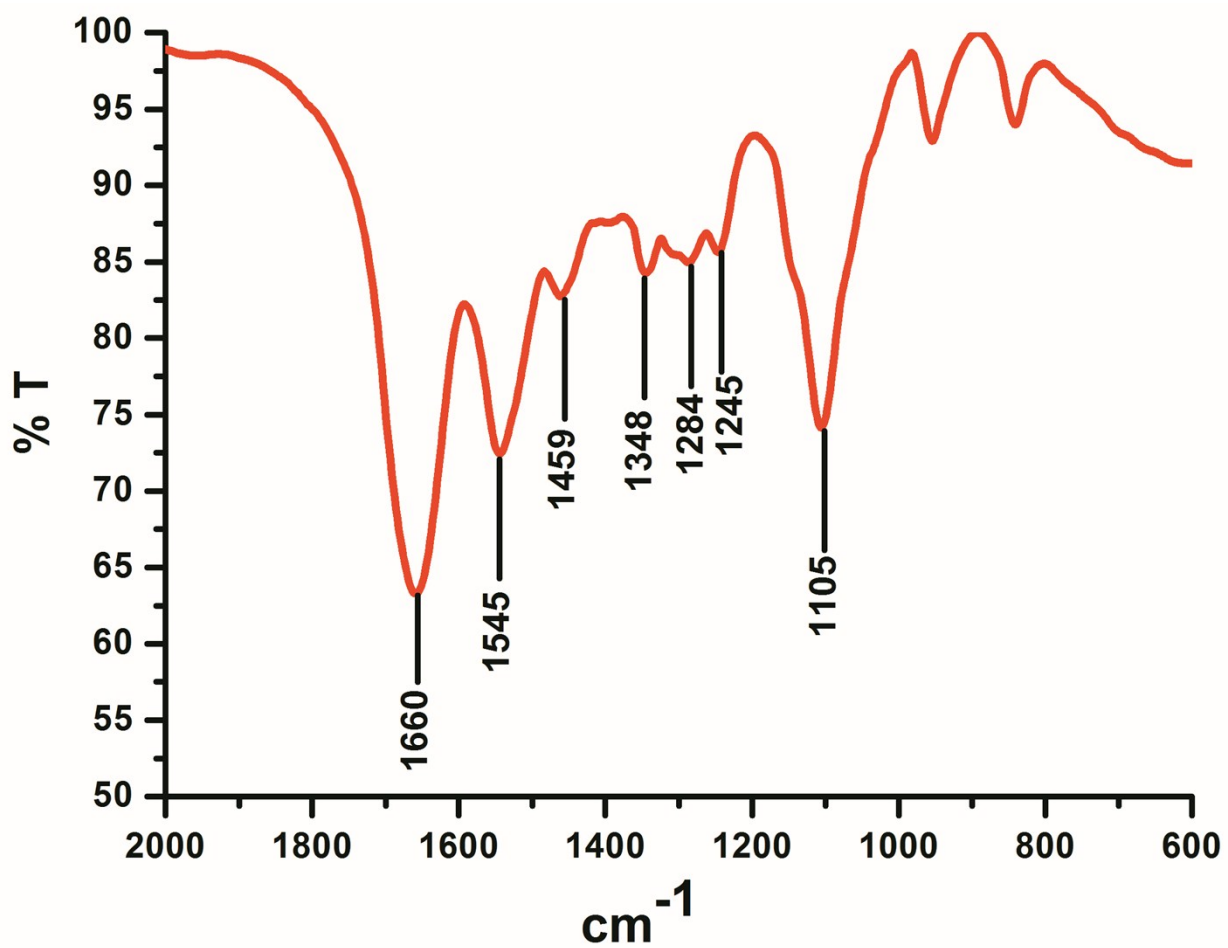

Fig S5. Solution state FT-IR of purothionin in the presence of buffer (range 600-2000 $\text{cm}^{-1}$ ).

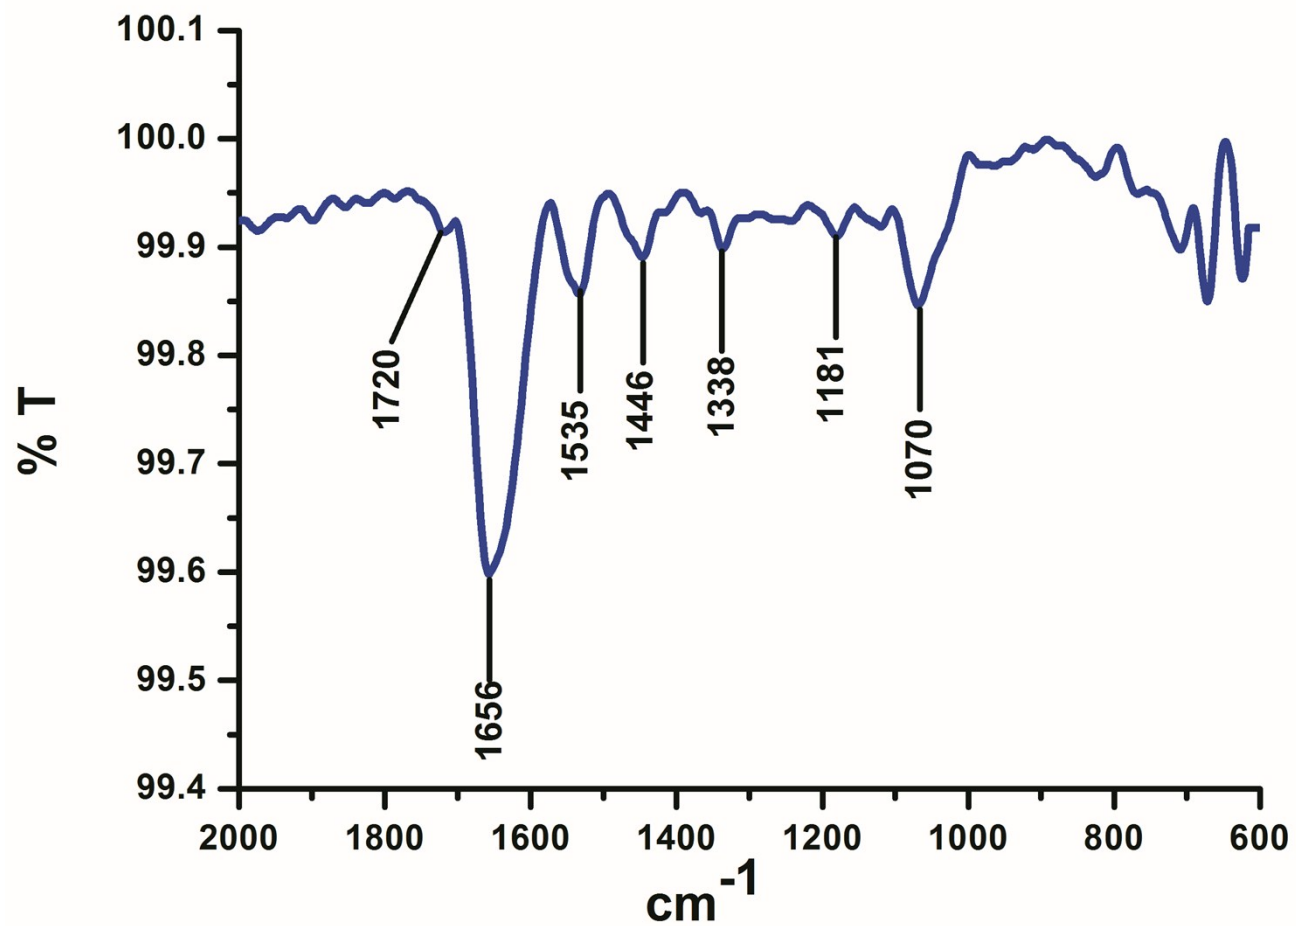

Fig S6. Solution state FT-IR of purothionin in the presence of  $\text{Ca}^{2+}$  (range 600-2000 $\text{cm}^{-1}$ ).

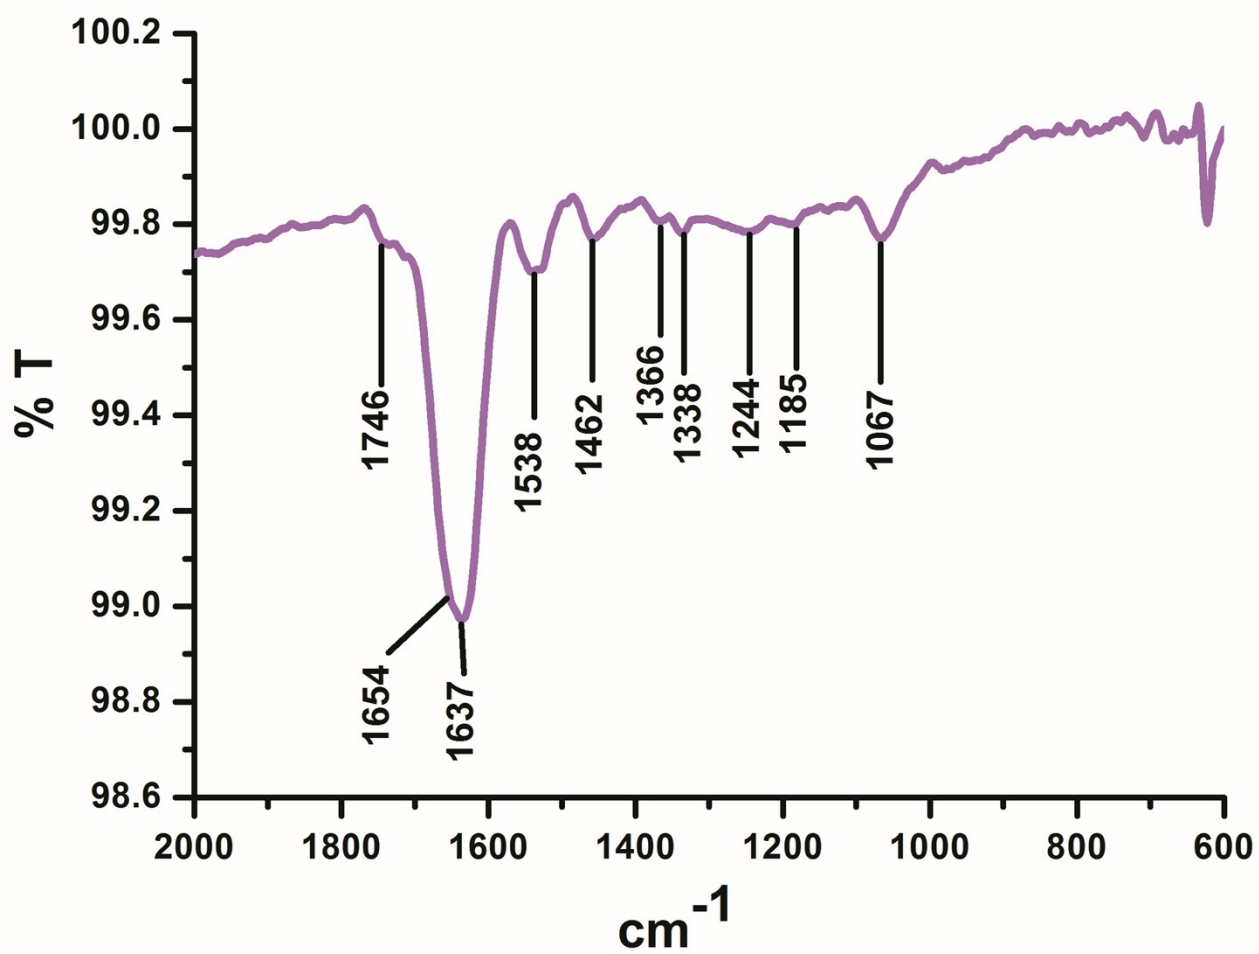

Fig S7. Solution state FT-IR of purothionin in the presence of  $Mg^{2+}$  (range 600-2000 $cm^{-1}$ ).

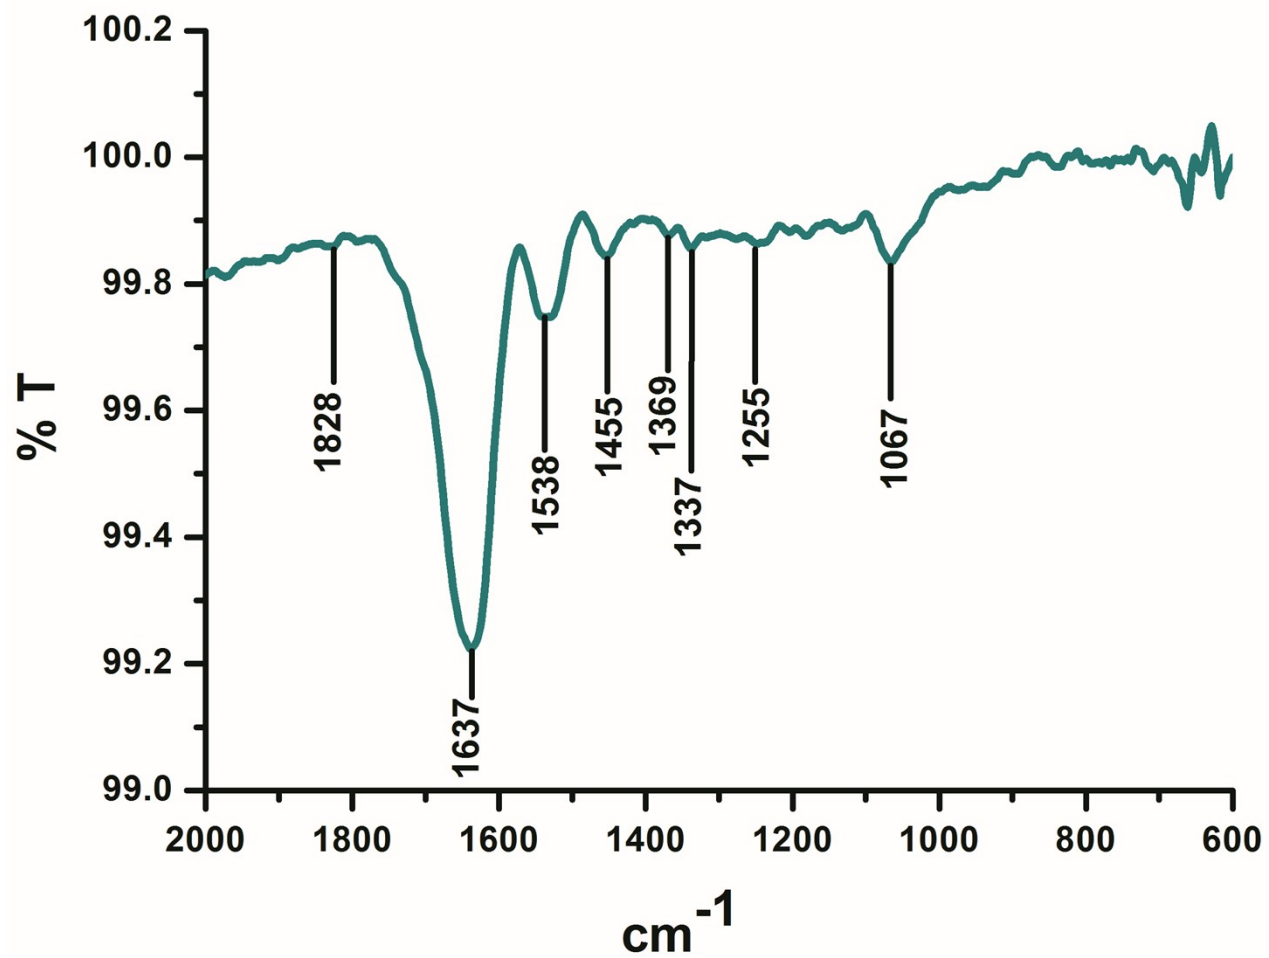



**Table S1. Overall secondary structural components computed over the complete MD trajectories**

| <b>Secondary structural components</b>    | <b>No salt</b> | <b>Ca<sup>2+</sup></b> | <b>Mg<sup>2+</sup></b> |
|-------------------------------------------|----------------|------------------------|------------------------|
| <b>Alpha</b>                              | <b>41</b>      | <b>43</b>              | <b>43</b>              |
| <b>Coil</b>                               | <b>22</b>      | <b>23</b>              | <b>21</b>              |
| <b>Turn</b>                               | <b>22</b>      | <b>20</b>              | <b>20</b>              |
| <b>Beta</b>                               | <b>13</b>      | <b>12</b>              | <b>14</b>              |
| <b>Others (3<sub>10</sub> helix etc.)</b> | <b>2</b>       | <b>2</b>               | <b>2</b>               |
